# Supplementary material for: Hot carrier creation in a nanoparticle dimer-molecule composite
Source: Royal Society of Chemistry journal article supplement (doi:10.1039/d4cp00950a), 2024-01-01
Supplement: d4cp00950a1.pdf [file d4cp00950a1.pdf]

## Supporting Information

### Hot Carrier Creation in a Nanoparticle Dimer-Molecule Composite

Junais Habeeb Mokkaath

[junais.mokkath@aasu.edu.kw](mailto:junais.mokkath@aasu.edu.kw)

College of Integrative Studies, Abdullah Al Salem University (AASU), Block 3, Khaldiya, Kuwait

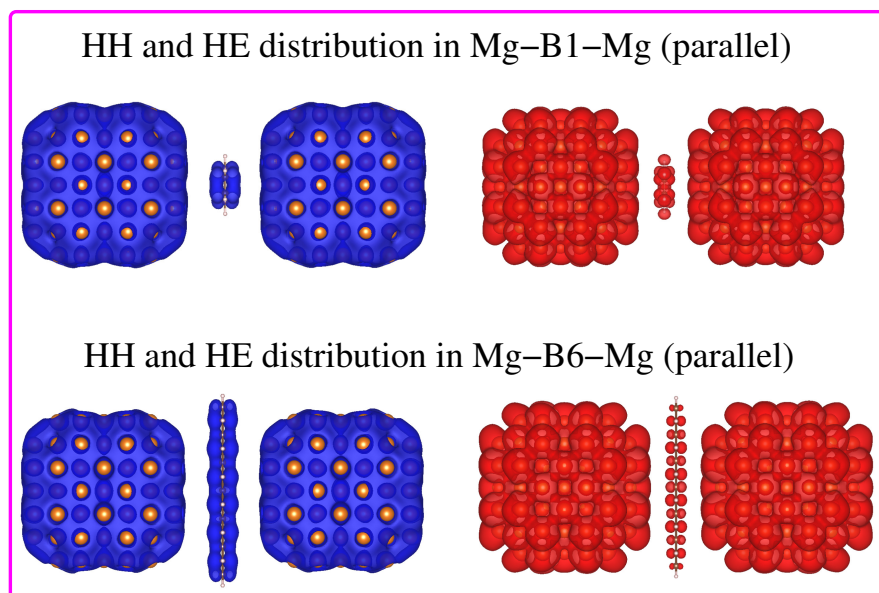

Figure S1: hot carrier distribution of Mg-B1-Mg (top) and Mg-B6-Mg (down) with parallel configuration of PAH molecules.

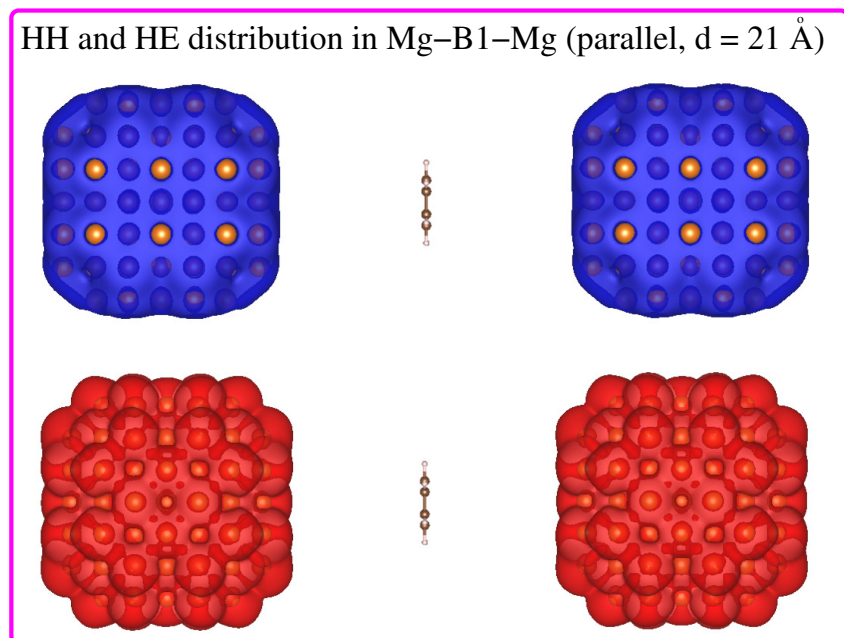

Figure S2: hot carrier distribution of Mg-B1-Mg parallel configuration with a large interparticle gap value of  $21 \text{ \AA}$ .

## Mg-Adenine-Mg

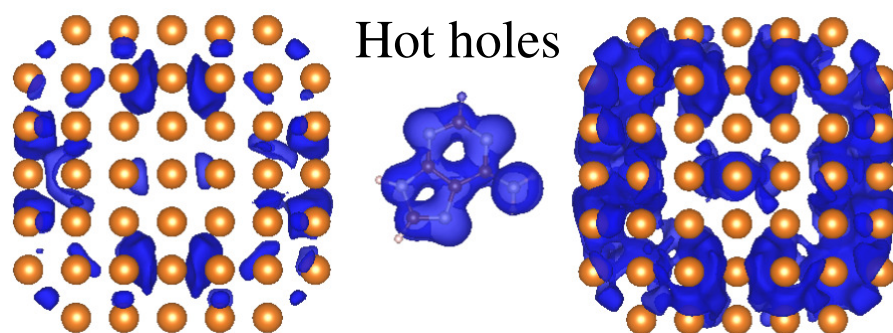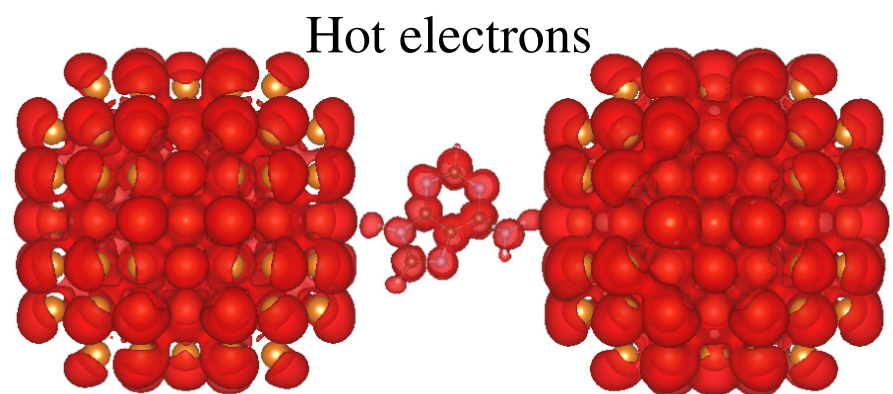

Figure S3: hot carrier distribution of Mg-Adenine-Mg.

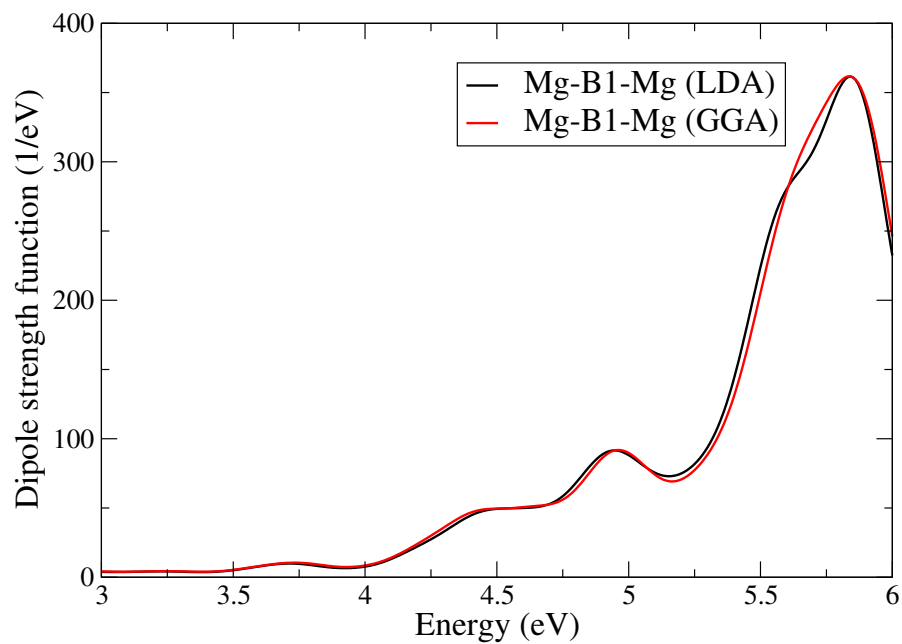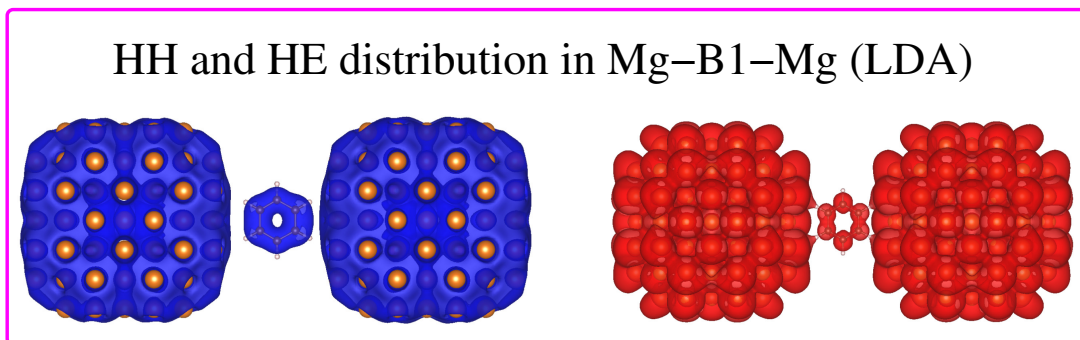

Figure S4 illustrates: at the top, a comparison of photabsorption using LDA and GGA functionals, and at the bottom, the distribution of hot carriers in Mg-Adenine-Mg.
